# Supplementary material
Source: PubMed Central journal article supplement (PMC7467080)

Figure 4a.

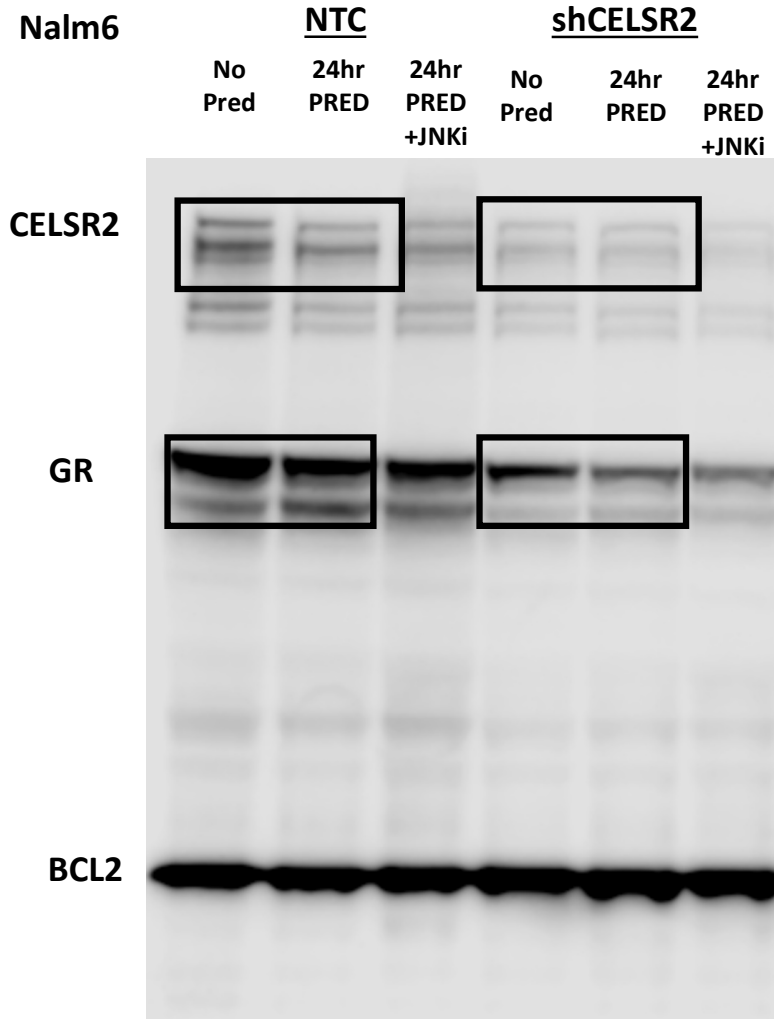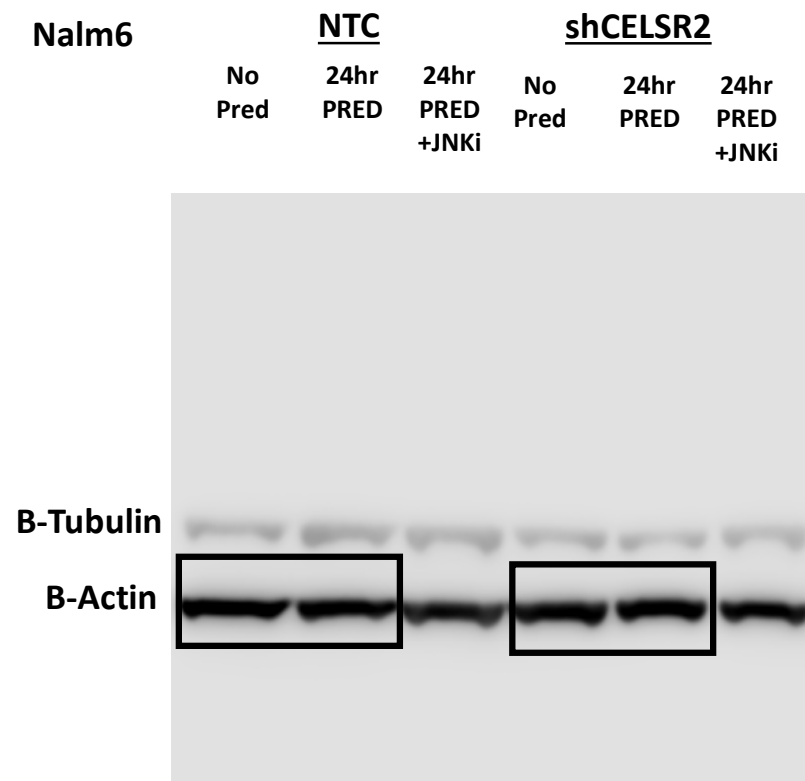

Figure 4e.

|       | NTC | NTC | shCELSR2 | shCELSR2 |             |
|-------|-----|-----|----------|----------|-------------|
| Nalm6 | -   | +   | -        | +        | NR3C1 (GR)  |
|       | +   | -   | +        | -        | GFP Control |

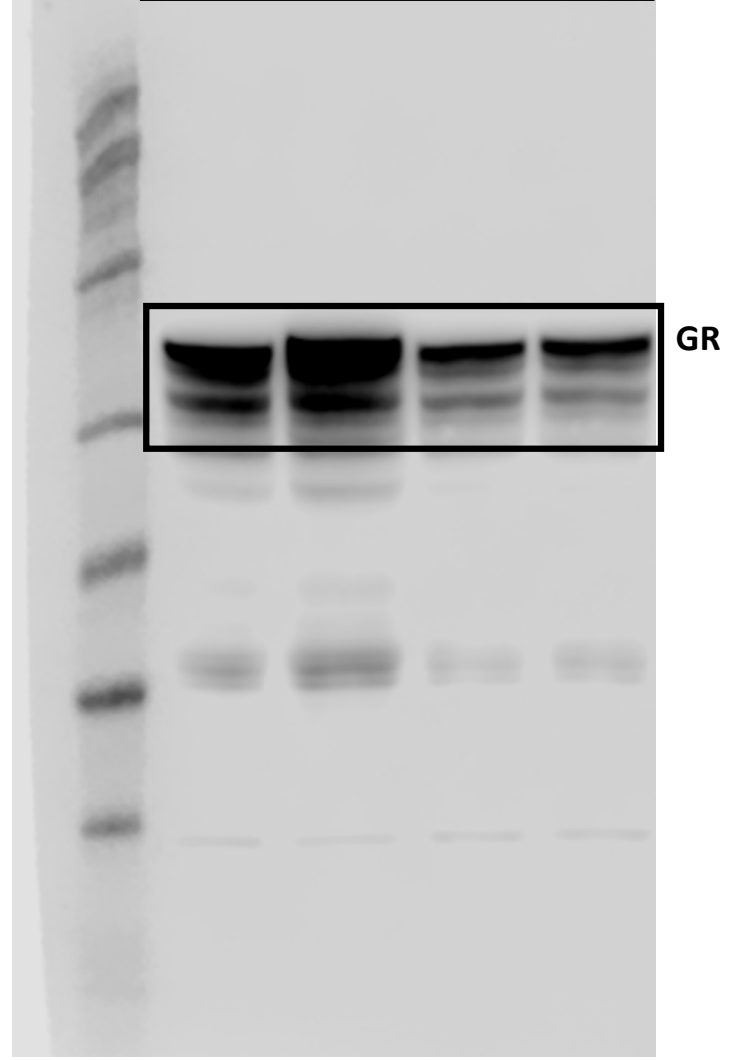

|       | NTC | NTC | shCELSR2 | shCELSR2 |             |
|-------|-----|-----|----------|----------|-------------|
| Nalm6 | -   | +   | -        | +        | NR3C1 (GR)  |
|       | +   | -   | +        | -        | GFP Control |

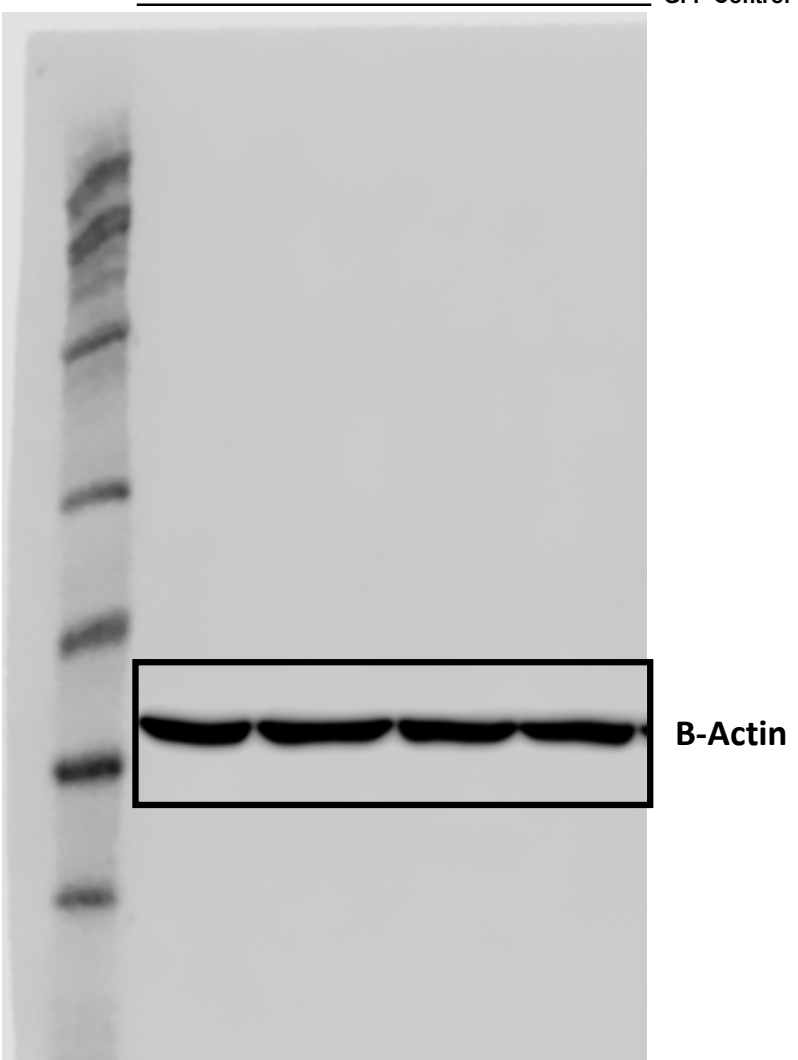

Supplement: NIHMS1614339-supplement-1614339_Source_Dat_Fig_4.pdf [file NIHMS1614339-supplement-1614339_Source_Dat_Fig_4.pdf]
