# Supplementary material
Source: PubMed Central journal article supplement (PMC7467080)

Extended Data Fig.7d-f

Nalm6

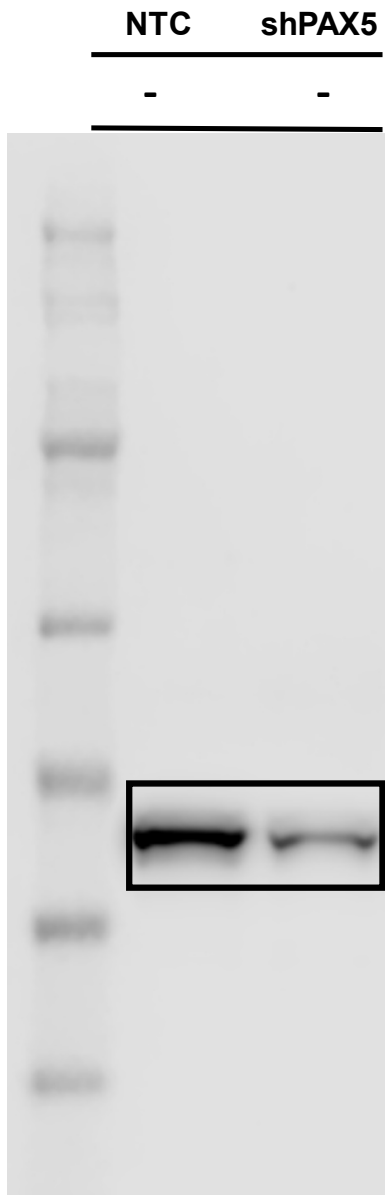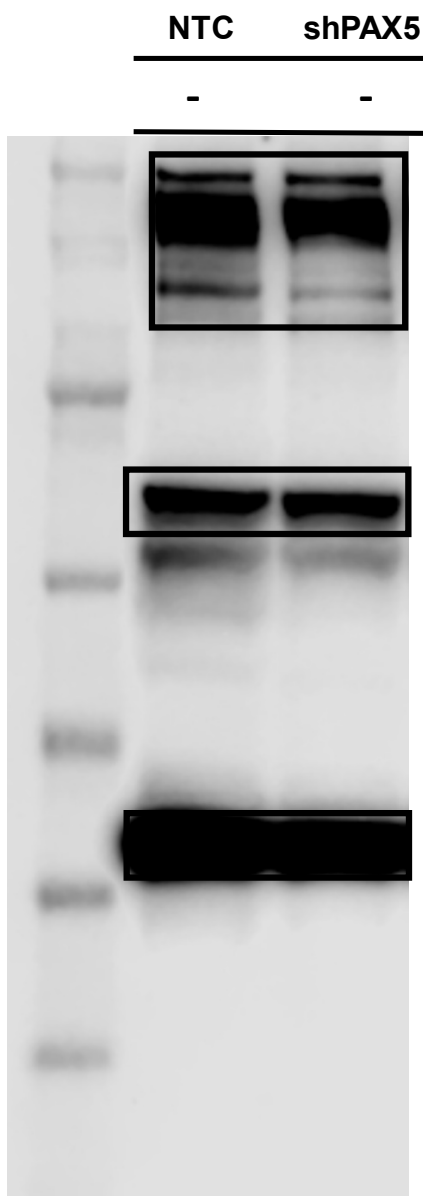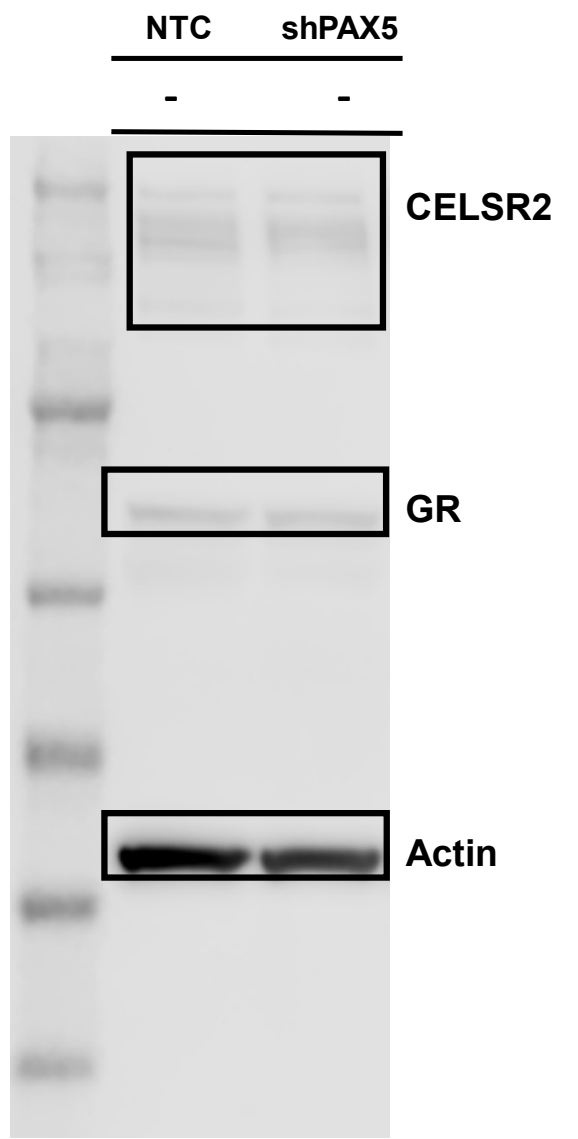

Supplement: NIHMS1614339-supplement-1614339_Source_Dat_ED_Fig_7.pdf [file NIHMS1614339-supplement-1614339_Source_Dat_ED_Fig_7.pdf]
